# Supplementary material for: Transition metals and trace elements in the retinal pigment epithelium and choroid: correlative ultrastructural and chemical analysis by analytical electron microscopy and nano-secondary ion mass spectrometry
Source: Royal Society of Chemistry journal article supplement (doi:10.1039/c7mt00259a), 2017-12-14
Supplement: c7mt00259a1.pdf [file c7mt00259a1.pdf]

## Supplementary Figures

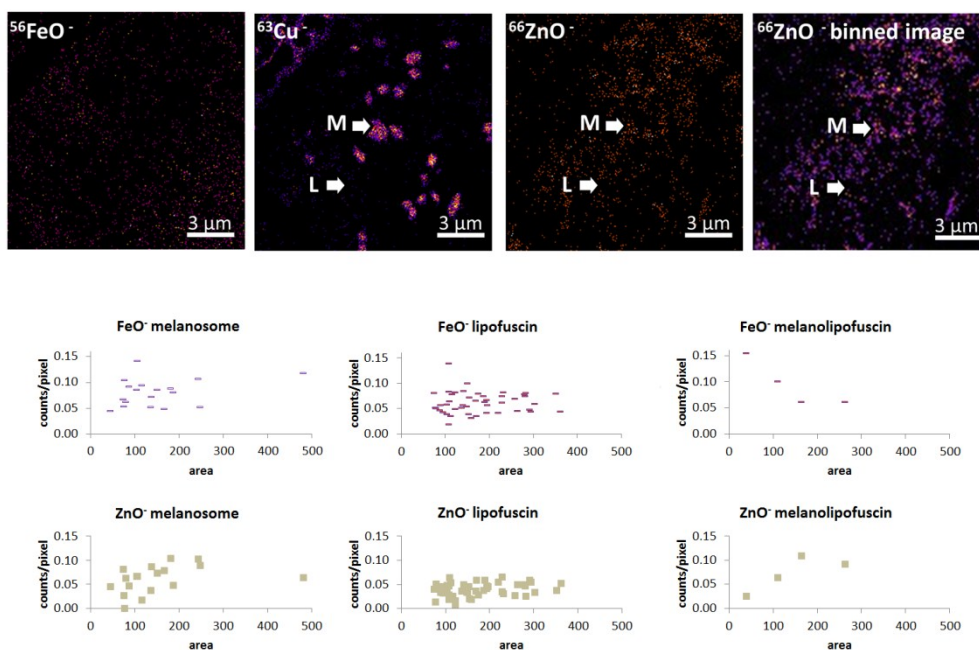

**Suppl. Figure 1: Nano-SIMS maps of  $\text{FeO}^-$ ,  $\text{Cu}^-$  and  $\text{ZnO}^-$  and respective counts per pixel values for the trace elements Zn and Fe, obtained with the  $\text{Cs}^+$  source. As the counts/pixel values are below the detection limit of about 1-2 cts/pixel, the maps are rather noisy and the data are not included in the main text. In contrast, the counts/pixel values for the  $\text{Cu}^-$  map (displayed here again for comparison), which was above the detection limit, can be obtained in Figure 8 in the main text. Note that although mapping shows a noisy signal for  $\text{ZnO}^-$ , binning and single spot spectroscopic analysis can be performed and yield proper signals.**

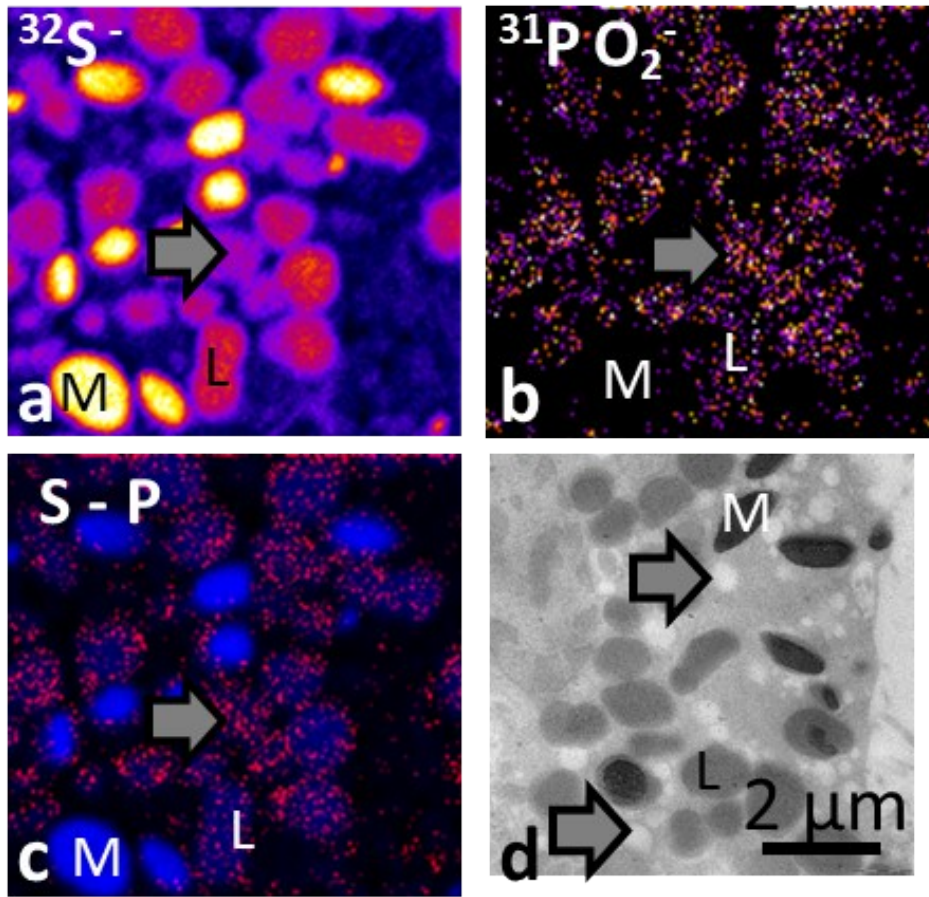

**Suppl. Figure 2: Differentiating lipofuscin granules from lysosome-like vesicles in SIMS maps of the human RPE:** (a) S map, (b) P map, (c) P-S false color overlay image, (d) EM image. The grey arrow points to a yet unidentified structure that is defined by lower S and higher P content as compared to lipofuscin. It is supposed to be similar to the vesicle like structures in (d).

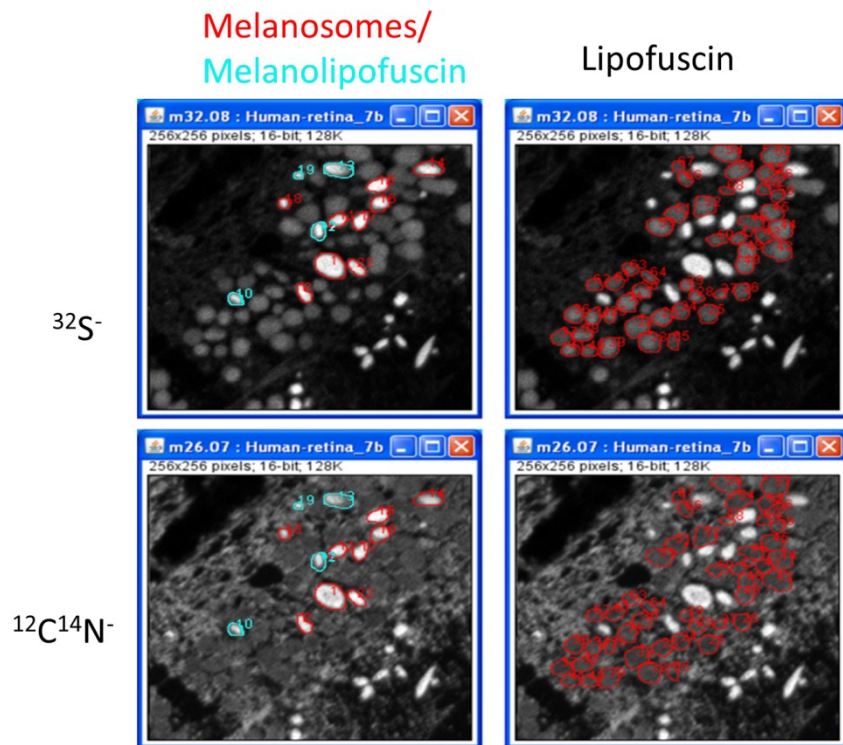

Suppl. Figure 3: **Exemplary depiction of how regions of interest were selected for melanosomes, melanolipofuscin and lipofuscin granules using sulfur and CN maps, respectively.** Once selected, the area appears in all ion maps of the same measurement and can be used for calculation of counts/pixel values for statistical analysis.
